# Supplementary material for: Engagement, Benefits, and Challenges in Continuing Professional Development among Sri Lankan Dental Practitioners
Source: Research Square preprint supplement (doi:10.21203/rs.3.rs-7994442/v1), 2025-12-03
Supplement: Supplementary file 1 [file 3cdb67f5d7e8148b1ba0ab1c.docx]

**Perception and Participation of Dental Professionals in Continuing Professional Development in Sri Lanka**

**Annexure I**

Dear Sir/Madam,

This survey is designed to gather information regarding how you see the importance of Continuing Professional Development / Continuing Dental Education (CPD/CDE) and your participation in such programs. We hope the findings will immensely help to identify your CPD requirements and take necessary actions to remove the barriers you face by increasing the awareness of the relevant authorities and decision-makers.

We very much appreciate it if you can take a few minutes of your valuable time to complete the following questionnaire and support us by making our endeavor a success.

Please be kind enough to submit your responses within a two-week time.

Thank you for your participation

Do you give your consent to participate in this study? Yes No

Have you ever participated in any CPD/CDE activity? Yes No

**Section A. Demographics**

Please tick in the relevant box.

1. Age

≤ 30 31-50 ≥ 50

1. Gender

Male Female

1. Marital status

Married Unmarried Divorced Widowed

1. Do you have school going children?

Yes No If yes how many

1. District where you currently practice - …………………...
2. How long have you worked in the clinical dental practice?

≤10 11-30 ≥ 30

1. Qualifications

BDS

MD/MS in which of the following specialty:

Oral and maxillofacial surgery

Orthodontics

Restorative dentistry

Community dentistry

Oral pathology

MSc

Please specify ……………………..

PhD

Postgraduate diploma

MPhil

Others: Please specify…………………...

1. Practice type

Government Private Both

Hospital Works in own Private practice

Armed forces Works in another dentist’s Private practice

Academic

Administrative

1. Average number of patients seen per day

| Number of patients | Government | Private |
| --- | --- | --- |
| <5 |  |  |
| 5-10 |  |  |
| >10 |  |  |

1. Average hours of work per week

| Government | Private | Both |
| --- | --- | --- |
|  |  |  |

1. Most of your working hours are related to:

General dentistry

Preventive dentistry

Paedodontics

Periodontology

Endodontics

Restorative dentistry

Oral surgery

Oral and maxillofacial surgery

Orthodontics

Dental implants

Others. Please specify……………...

1. Do you have membership in any Professional Association?

International National

Please specify:

………….…………………… ………………………………….

…………………..…………… …………………………………..

**Section B. Participation in continuing educational activities**

1. Have you ever participated in any kind of Continuing Dental Education (CDE)/ Continuing Professional Development (CPD) in the **last 5 years**?

Yes No

1. Do you intend attending any CDE/CPD program **within the next 2 years**?

Yes No

1. What are the different types of CPD/CDE activities that you have participated in within the last 5 years?

You may select one or more options

Attendinglectures

Workshops/Hands on lab workshops

Hands on clinical workshops

Attending small group tutorials

Web based distant learning

Videos

Books/journal reading

Attending seminars/conferences

Discussions with dental colleagues

Discussions with medical colleagues

Others. Please specify. ………………………………………………………………

1. The CPD/CDE programs that you have attended were in which of the following disciplines?

Clinical

Restorative dentistry

Oral and maxillofacial surgery

Oral medicine

Oral pathology

Orthodontics

Community dentistry

Periodontology

Endodontics

Dental implants

Paedodontics

General dentistry

Prosthodontics

Oral surgery

Others:……………………..................................

Non-clinical

Curriculum development

Counselling and mentoring

Practice management

Dento-legal issues

Others: Please specify……………………..................................

1. The CPD/CDE programs you participated were organized by which of the following Associations/Colleges?

National

SLDA- Sri Lanka Dental Association

General

Branch and Branch name…………………...

College of Dentistry and Stomatology of Sri Lanka

College of Community Dentistry of Sri Lanka

College of General Dental Practitioners of Sri Lanka

College of Oral & Maxillofacial Surgeons of Sri Lanka

General Dental Practitioners’ Association

Government Dental Surgeons’ Association

Sri Lanka Association of Oral Medicine & Oral Pathology

Sri Lanka Orthodontic Society

Association of Specialists in Restorative Dentistry Sri Lanka

Sri Lanka Academy of Aesthetic and Cosmetic Dentistry

National Center for CPD in Medicine

Other-……………………..................................

International

International Association for Dental Research (IADR)

World Dental Federation (FDI)

Asia Pacific Dental Congress (ADPC)

Others; please specify…………………………………

1. Why did you attend CPD/CDE programmes?

Improve knowledge

Learn new skills

Personal satisfaction

Socialize with colleagues

Supplement the knowledge gained at undergraduate training

Other………………………………………………………

1. To what extent have the following influenced your access to CPD?

Please tick (✔) in the relevant box.

|  | Strongly impacted | Impacted | No idea | Not impacted | Strongly not impacted |
| --- | --- | --- | --- | --- | --- |
| Topic of the course/lecture/workshop |  |  |  |  |  |
| Identity of lecturer/s |  |  |  |  |  |
| Travelling cost |  |  |  |  |  |
| Travel time |  |  |  |  |  |
| Family commitments |  |  |  |  |  |
| Cost of registration |  |  |  |  |  |
| Loss of income |  |  |  |  |  |
| Whether could involve in practical components |  |  |  |  |  |
| Potential to make new contacts |  |  |  |  |  |
| Day of the week |  |  |  |  |  |
| Month of the year |  |  |  |  |  |
| Time of the day |  |  |  |  |  |
| Opportunity to combine the day of the course with a holiday |  |  |  |  |  |
| The mode of delivery of CPD programs  Onsite/Online/Both |  |  |  |  |  |

**Section C. Benefits, barriers and your opinion about CPD/CDE**

You may select one or more options for these questions.

1. What benefits did you gain by attending CPD courses?

Better understanding of the subject

Knowledge of new treatment techniques/methods

Improved patient care

Getting updated about new materials

Using Evidence based practice

Other………………………………………………………………

1. What are the barriers that prevent you from attending CPD programs?

Cost

Location /place

Loss of a day per week

Courses are not relevant

Loss of income

Busy schedule

Family commitments

No incentives

No duty leaves

Other………………………………………………………………….

1. Your opinion on CPD/CDE in Sri Lanka

**Please tick (✔) in the relevant box.**

|  | Strongly agree | Agree | Neutral | Disagree | Strongly disagree |
| --- | --- | --- | --- | --- | --- |
| I believe that CPD is important for safe clinical practice |  |  |  |  |  |
| I believe that CPD is important for evidence based clinical practice |  |  |  |  |  |
| I achieved my objectives by participating in CPD programs in last 5 years |  |  |  |  |  |
| I think that CPD programs should be made mandatory for dentists in Sri Lanka |  |  |  |  |  |
| I am satisfied with the CPD/CDE programs that I attended within the last 5 years. |  |  |  |  |  |
| I think that CPD points should be considered before renewing the SLMC registration. |  |  |  |  |  |
| I think more verifiable CPD programs should be conducted by Colleges and Associations |  |  |  |  |  |
| I would like the Faculty of Dental Sciences to conduct more CPD programs |  |  |  |  |  |

1. Kindly list your top priority CPD/CDE learning requirements.

1. ……………………………………………..

2. ……………………………………………..

3. ……………………………………………..

4. ……………………………………………..

5. ……………………………………………..

**Thank you for spending your valuable time to complete the questionnaire.**
